# Supplementary material for: [18F]fluoride Activation and 18F-Labelling in Hydrous Conditions—Towards a Microfluidic Synthesis of PET Radiopharmaceuticals
Source: MDPI journal article supplement (doi:10.3390/molecules29010147), 2023-12-26
Supplement: s1 [file s1]

## **SUPPLEMENTARY INFORMATION**

### **[<sup>18</sup>F]Fluoride activation and <sup>18</sup>F-labelling in hydrous conditions – towards a microfluidic synthesis of PET radiopharmaceuticals**

Olga Ovdiichuk,<sup>\*1</sup> Salla Lahdenpohja,<sup>2</sup> Quentin Béen,<sup>1</sup> Laurent Tanguy,<sup>3</sup> Bertrand Kuhnast,<sup>2</sup> Charlotte Collet-Defossez <sup>1,4</sup>

<sup>a</sup> Nancyclotep, Molecular Imaging platform, 54500 Vandoeuvre-les-Nancy, France

<sup>b</sup> Université Paris Saclay, CEA Inserm, CNRS, BioMaps, 91401 Orsay, France

<sup>c</sup> PMB-Alcen, 13790 Peynier, France

<sup>d</sup> Université de Lorraine, Inserm, IADI, F-54000 Nancy, France

\*Correspondence: oovdiichuk@nancyclotep.com (OO)

#### **Content**

Figure S1. Microfluidic cassette.

Figure S2. Elution pathways inside microfluidic cassette.

Table S1. Nucleophilic <sup>18</sup>F-fluorination conditions for each labelled tracer/prosthetic agent.

Details of radio-HPLC.

Table S2. HPLC conditions.

Table S3. Comparison of the mass of QMA-CO<sub>3</sub> beads between different suppliers.

Table S4. Results from manual elution using kryptofix-based method.

Table S5. Results from manual elution using TBA-based method.

Table S6. Results from microfluidic elution using kryptofix-based method.

**Figure S1.** Picture of iMiDEV™ microfluidic cassette

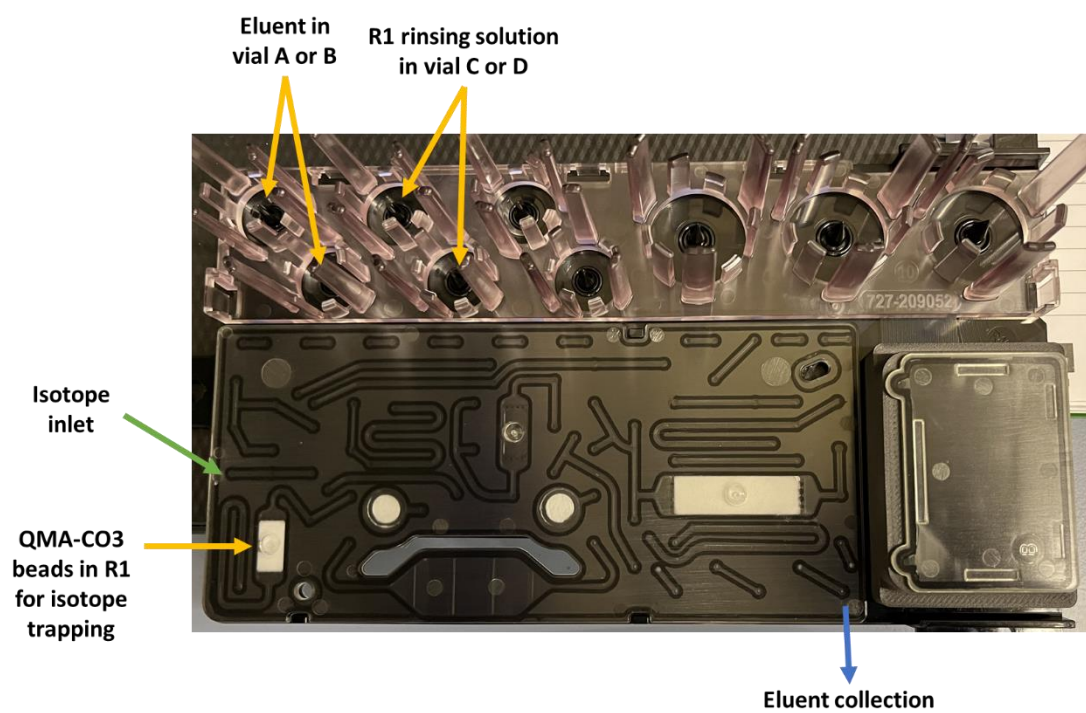

**Figure S2.** Cassette architecture with liquid and gas pathways marked in green, orange and yellow. A) Trapping  $^{18}\text{F}$ fluoride on QMA- $\text{CO}_3$  (Waters®) beads in R1; B) rinsing the QMA- $\text{CO}_3$  beads with MeCN from C (green) or alternatively from D (orange); C) elution  $^{18}\text{F}$ fluoride from R1 with eluent in A (green) or alternatively in B (orange).

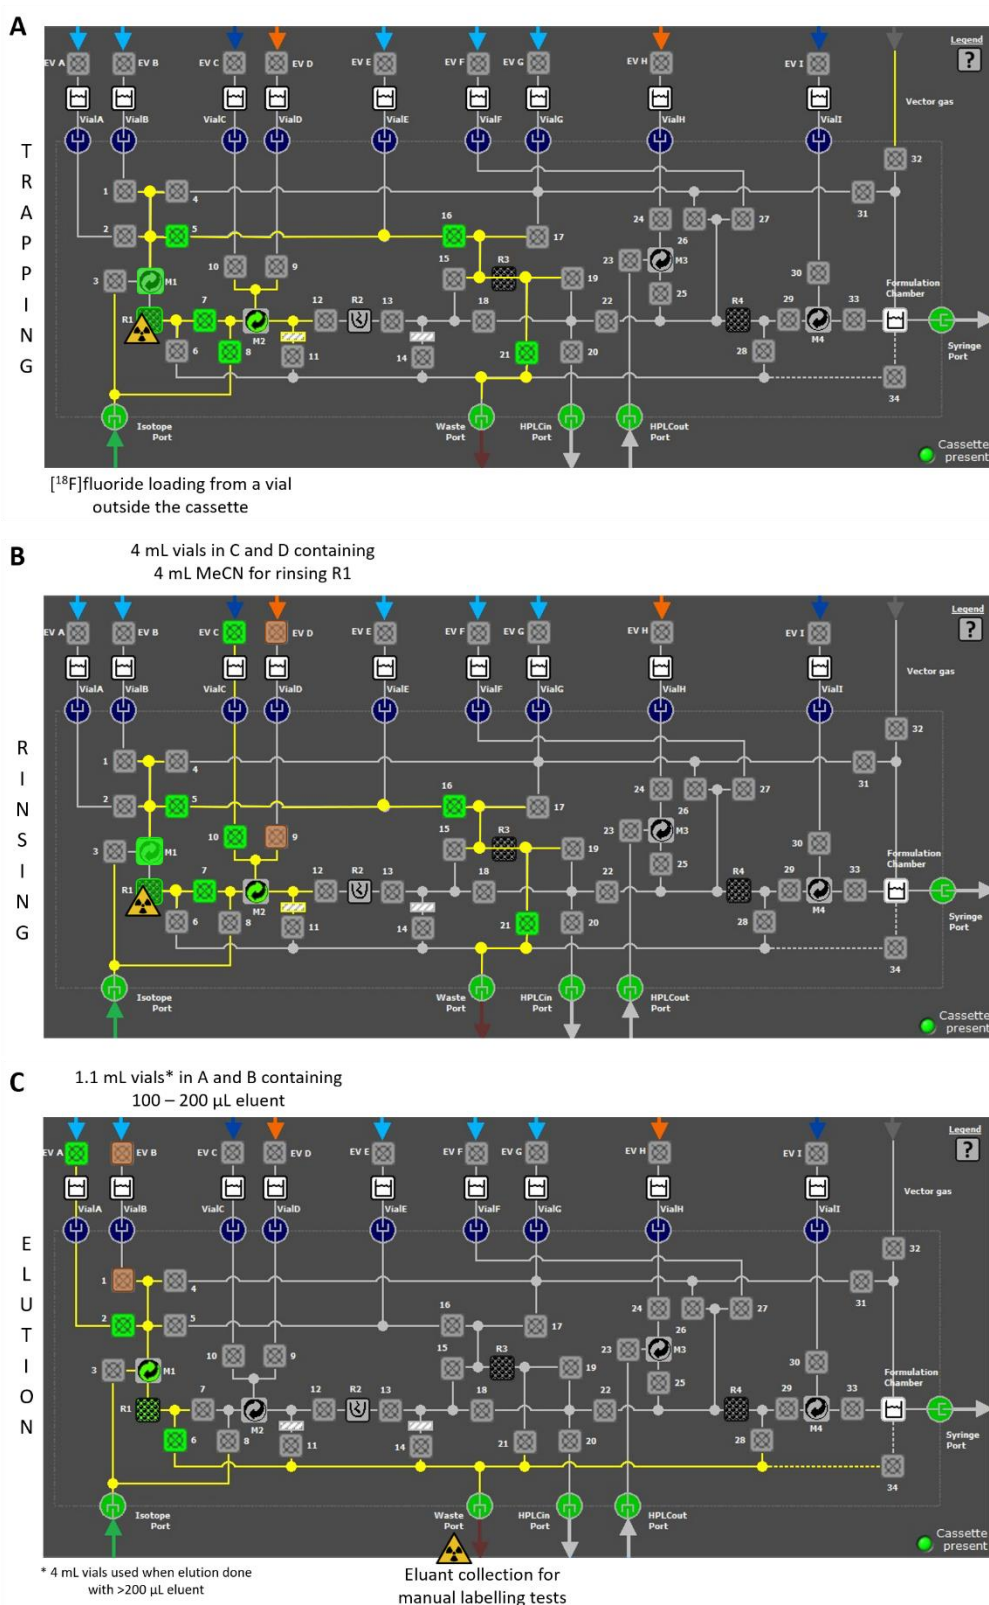

**Table S1.** Results of the azeotropic drying free nucleophilic  $^{18}\text{F}$ -fluorination (n = 3).

| Entry | Product                                                 | Precursor quantity            | Activating agent (150 $\mu\text{L}$ )                                                    | Precursor Solvent (150 $\mu\text{L}$ )        | Labelling conditions        | RCC, %               |
|-------|---------------------------------------------------------|-------------------------------|------------------------------------------------------------------------------------------|-----------------------------------------------|-----------------------------|----------------------|
| 1     | $^{18}\text{F}$ FTAG                                    | 5 mg (10.4 $\mu\text{mol}$ )  | 3% $\text{H}_2\text{O}$ $\text{K}_{222}/\text{K}_2\text{CO}_3$ in $\text{CH}_3\text{CN}$ | 100% $\text{CH}_3\text{CN}$                   | 95 $^\circ\text{C}$ 5 min   | 82.2 $\pm$ 5.8       |
| 2     | $^{18}\text{F}$ FTAG                                    | 5 mg (10.4 $\mu\text{mol}$ )  | 5% $\text{H}_2\text{O}$ TBAB <sub>40%</sub> in $\text{CH}_3\text{CN}$                    | 100% $\text{CH}_3\text{CN}$                   | 95 $^\circ\text{C}$ 10 min  | 89.9 $\pm$ 2.4       |
| 3     | $^{18}\text{F}$ F-Me-OTs                                | 7 mg (19.6 $\mu\text{mol}$ )  | 3% $\text{H}_2\text{O}$ $\text{K}_{222}/\text{K}_2\text{CO}_3$ in $\text{CH}_3\text{CN}$ | 9/1 $\text{CH}_3\text{CN}/\text{H}_2\text{O}$ | 120 $^\circ\text{C}$ 10 min | 63.9 $\pm$ 4.3       |
| 4     | $^{18}\text{F}$ F-Me-OTs                                | 7 mg (19.6 $\mu\text{mol}$ )  | 3% $\text{H}_2\text{O}$ $\text{K}_{222}/\text{K}_2\text{CO}_3$ in $\text{CH}_3\text{CN}$ | 8/2 $\text{CH}_3\text{CN}/\text{H}_2\text{O}$ | 120 $^\circ\text{C}$ 10 min | 49.2 $\pm$ 17.8      |
| 5     | $^{18}\text{F}$ F-Me-OTs                                | 7 mg (19.6 $\mu\text{mol}$ )  | 5% $\text{H}_2\text{O}$ TBAB <sub>40%</sub> in $\text{CH}_3\text{CN}$                    | 8/2 $\text{CH}_3\text{CN}/\text{H}_2\text{O}$ | 120 $^\circ\text{C}$ 10 min | 49.7 $\pm$ 0.9       |
| 6     | $^{18}\text{F}$ DPA-714 (OTs prec)                      | 1.5 mg (2.7 $\mu\text{mol}$ ) | 2% $\text{H}_2\text{O}$ $\text{K}_{222}/\text{K}_2\text{CO}_3$ in $\text{CH}_3\text{CN}$ | 100% DMSO                                     | 130 $^\circ\text{C}$ 10 min | 52.5 $\pm$ 10.1      |
| 7     | $^{18}\text{F}$ DPA-714 (OTs prec)                      | 1.5 mg (2.7 $\mu\text{mol}$ ) | 5% $\text{H}_2\text{O}$ $\text{K}_{222}/\text{K}_2\text{CO}_3$ in $\text{CH}_3\text{CN}$ | 100% DMSO                                     | 130 $^\circ\text{C}$ 10 min | 41.2 $\pm$ 9.0       |
| 8     | $^{18}\text{F}$ DPA-714 (OTs prec)                      | 1.2 mg (2.2 $\mu\text{mol}$ ) | 5% $\text{H}_2\text{O}$ TBAB <sub>40%</sub> in $\text{CH}_3\text{CN}$                    | 100% DMSO                                     | 130 $^\circ\text{C}$ 10 min | 66.0 $\pm$ 10%       |
| 9     | $^{18}\text{F}$ Fallypride (OTs prec)                   | 1.0 mg (1.9 $\mu\text{mol}$ ) | 2% $\text{H}_2\text{O}$ $\text{K}_{222}/\text{K}_2\text{CO}_3$ in $\text{CH}_3\text{CN}$ | 100% DMSO                                     | 130 $^\circ\text{C}$ 10 min | 41.6 $\pm$ 9.8       |
| 10    | $^{18}\text{F}$ Fallypride (OTs prec)                   | 1.0 mg (1.9 $\mu\text{mol}$ ) | 5% $\text{H}_2\text{O}$ $\text{K}_{222}/\text{K}_2\text{CO}_3$ in $\text{CH}_3\text{CN}$ | 100% DMSO                                     | 130 $^\circ\text{C}$ 10 min | 18.7 $\pm$ 1.4 (n=2) |
| 11    | $^{18}\text{F}$ LBT-999 (Cl prec)                       | 1.5 mg (4.3 $\mu\text{mol}$ ) | 2% $\text{H}_2\text{O}$ $\text{K}_{222}/\text{K}_2\text{CO}_3$ in $\text{CH}_3\text{CN}$ | 100% DMSO                                     | 130 $^\circ\text{C}$ 10 min | 39.5 $\pm$ 1.7       |
| 12    | $^{18}\text{F}$ LBT-999 (Cl prec)                       | 1.5 mg (4.3 $\mu\text{mol}$ ) | 5% $\text{H}_2\text{O}$ $\text{K}_{222}/\text{K}_2\text{CO}_3$ in $\text{CH}_3\text{CN}$ | 100% DMSO                                     | 130 $^\circ\text{C}$ 10 min | 29.8 $\pm$ 1.4       |
| 13    | $^{18}\text{F}$ FPyNHS (DABCO prec)                     | 2.4 mg (4.9 $\mu\text{mol}$ ) | 2% $\text{H}_2\text{O}$ $\text{K}_{222}/\text{K}_2\text{CO}_3$ in $\text{CH}_3\text{CN}$ | 100% DMSO                                     | 40 $^\circ\text{C}$ 10 min  | 16.4 $\pm$ 3.2       |
| 14    | $^{18}\text{F}$ FPyNHS (DABCO prec)                     | 2.5 mg (5.2 $\mu\text{mol}$ ) | 5% $\text{H}_2\text{O}$ $\text{K}_{222}/\text{K}_2\text{CO}_3$ in $\text{CH}_3\text{CN}$ | 100% DMSO                                     | 40 $^\circ\text{C}$ 10 min  | 5.0 $\pm$ 3.4        |
| 15    | $^{18}\text{F}$ FPyOBn (DABCO prec)                     | 1.3 mg (2.7 $\mu\text{mol}$ ) | 2% $\text{H}_2\text{O}$ $\text{K}_{222}/\text{K}_2\text{CO}_3$ in $\text{CH}_3\text{CN}$ | 100% DMSO                                     | 80 $^\circ\text{C}$ 10 min  | 97.9 $\pm$ 0.2 (n=2) |
| 16    | $^{18}\text{F}$ FPyOBn (DABCO prec)                     | 1.2 mg (2.5 $\mu\text{mol}$ ) | 5% $\text{H}_2\text{O}$ $\text{K}_{222}/\text{K}_2\text{CO}_3$ in $\text{CH}_3\text{CN}$ | 100% DMSO                                     | 80 $^\circ\text{C}$ 10 min  | 95.7 $\pm$ 0.6 (n=2) |
| 17    | $^{18}\text{F}$ FPyZIDE ( $\text{Me}_3\text{N}^+$ prec) | 1.3 mg (2.8 $\mu\text{mol}$ ) | 2% $\text{H}_2\text{O}$ $\text{K}_{222}/\text{K}_2\text{CO}_3$ in $\text{CH}_3\text{CN}$ | 100% DMSO                                     | 130 $^\circ\text{C}$ 10 min | 60.9 $\pm$ 14.1      |
| 18    | $^{18}\text{F}$ FPyZIDE ( $\text{Me}_3\text{N}^+$ prec) | 1.4 mg (3.0 $\mu\text{mol}$ ) | 5% $\text{H}_2\text{O}$ $\text{K}_{222}/\text{K}_2\text{CO}_3$ in $\text{CH}_3\text{CN}$ | 100% DMSO                                     | 130 $^\circ\text{C}$ 10 min | 27.1 $\pm$ 2.6       |
| 19    | $^{18}\text{F}$ FPyZIDE ( $\text{NO}_2$ prec)           | 1.2 mg (4.0 $\mu\text{mol}$ ) | 2% $\text{H}_2\text{O}$ $\text{K}_{222}/\text{K}_2\text{CO}_3$ in $\text{CH}_3\text{CN}$ | 100% DMSO                                     | 130 $^\circ\text{C}$ 10 min | 12.6 $\pm$ 2.4       |
| 20    | $^{18}\text{F}$ FPyZIDE ( $\text{NO}_2$ prec)           | 1.2 mg (4.0 $\mu\text{mol}$ ) | 5% $\text{H}_2\text{O}$ $\text{K}_{222}/\text{K}_2\text{CO}_3$ in $\text{CH}_3\text{CN}$ | 100% DMSO                                     | 130 $^\circ\text{C}$ 10 min | 1.4 $\pm$ 0.9        |

**Details of radio-HPLC analyses:**

HPLCs were performed on:

[HPLC A]: Alliance e2695 system equipped with a 2998 PDA detector and Herm LB500 equipped with NaI detector (Berthold) controlled by the Empower Software (Waters), Zorbax SB-C18 5  $\mu$ m 4.6  $\times$  250 mm analytical column (Agilent).

[HPLC B]: Alliance e2695 system equipped with a 2998 PDA detector and Herm LB500 equipped with NaI detector (Berthold) controlled by the Empower Software (Waters), Symmetry-M<sup>®</sup> C-18 5 $\mu$ m 150  $\times$  4.6 mm analytical column (Waters).

[HPLC C]: Alliance 2690 system equipped with a 996 PDA detector (Waters) and a LB509 radioactivity detector (Berthold) controlled by the Empower Software (Waters), Symmetry-M<sup>®</sup> C-18 5 $\mu$ m 50  $\times$  4.6 mm analytical column (Waters).

Elutions were performed using the following solvents:

S1: water containing 0.1% TFA

S2: acetonitrile containing 0.1% TFA

S3: water containing Low-UV PIC<sup>®</sup> B7 reagent (20 mL for 1000 mL) (Waters)

S4: water:acetonitrile 30:70 (v:v) containing Low-UV PIC<sup>®</sup> B7 reagent (20 mL for 1000 mL) (Waters)

Solvent mixtures, flow rates,  $\lambda$  detection and retention times of radiotracers are summarized in Table S2.

**Table S2:** HPLC conditions.

| Radiotracer                      | HPLC system | Eluant mixture (v:v) | Flow rate (mL/min) | $\lambda$ (nm) | Radio-HPLC Rt (min) |
|----------------------------------|-------------|----------------------|--------------------|----------------|---------------------|
| [ <sup>18</sup> F]F-Me-OTs       | A           | S1:S2 (55:45)        | 1                  | 254            | 9.6                 |
| [ <sup>18</sup> F]Tosyl fluoride | A           | S1:S2 (55:45)        | 1                  | 254            | 13.3                |
| [ <sup>18</sup> F]DPA-714        | B           | S1:S2 (55:45)        | 1                  | 263            | 3.9                 |
| [ <sup>18</sup> F]DPA-714        | C           | S3:S4 (40:60)        | 2                  | 254            | 2.1                 |
| [ <sup>18</sup> F]Fallypride     | C           | S3:S4 (60:40)        | 2.5                | 220            | 1.6                 |
| [ <sup>18</sup> F]LBT-999        | C           | S3:S4 (55:45)        | 2                  | 220            | 2.2                 |
| [ <sup>18</sup> F]FPyNHS         | C           | S3:S4 (75:25)        | 2                  | 260            | 1.8                 |
| [ <sup>18</sup> F]FPyZIDE        | C           | S3:S4 (60:40)        | 2                  | 267            | 2.6                 |
| [ <sup>18</sup> F]FPyOBn         | C           | S3:S4 (35:65)        | 2                  | 254            | 2.7                 |

**Table S3.** Comparison of the mass of anion exchange beads between different suppliers

| Mass\Supplier             | Waters Sep-Pak Accell Plus QMA Carbonate Light Cartridge | Eichrom QMA-S-BC, (QMA-CO <sub>3</sub> ) | Maxi-Clean S-Pure QMA-CO <sub>3</sub> |
|---------------------------|----------------------------------------------------------|------------------------------------------|---------------------------------------|
| Mass declared by supplier | 130 mg                                                   | 125 mg                                   | 125 mg                                |
| Mass measured (n = 3)     | 108 $\pm$ 1 mg                                           | 118.7 $\pm$ 0.4 mg                       | 54.4 $\pm$ 1.9 mg                     |

**Table S4.** Results of the elution efficiencies (EE) obtained in manual [ $^{18}\text{F}$ ]fluoride fractionated elution tests using kryptofix-based method ( $n = 3$ ) and 3 different QMA- $\text{CO}_3$  types of beads (25 mg/cartridge)

| Entry | Volume of eluent<br>( $\text{K}_{222}/\text{K}_2\text{CO}_3/\text{MeCN}$ , 3%<br>$\text{H}_2\text{O}$ ) | EE average<br>(Waters) | EE average (Eichrom) | EE average<br>(S*Pure) |
|-------|---------------------------------------------------------------------------------------------------------|------------------------|----------------------|------------------------|
| 1     | 0.1 mL                                                                                                  | 2.5 $\pm$ 1.2%         | 7.3 $\pm$ 6.8%       | 0.3 $\pm$ 0.3%         |
| 2     | 0.2 mL                                                                                                  | 34.4 $\pm$ 2.6%        | 41.8 $\pm$ 6.3%      | 4.7 $\pm$ 3.6%         |
| 3     | 0.3 mL                                                                                                  | 67.5 $\pm$ 4.3%        | 73.4 $\pm$ 9.4%      | 20.1 $\pm$ 10.7%       |
| 4     | 0.4 mL                                                                                                  | 86.3 $\pm$ 3.1%        | 90.0 $\pm$ 5.3%      | 43.1 $\pm$ 12.7%       |
| 5     | 0.5 mL                                                                                                  | 94.1 $\pm$ 1.4%        | 96.4 $\pm$ 2.9%      | 68.3 $\pm$ 7.6%        |

**Table S5.** Results of the elution efficiencies (EE) obtained in manual [ $^{18}\text{F}$ ]fluoride fractionated elution tests using tetrabutylammonium-based method ( $n = 3$ ) and 3 different QMA- $\text{CO}_3$  types of beads (25 mg/cartridge)

| Entry | Volume of eluent<br>(TBAB 5%) | EE average<br>(Waters) | EE average<br>(Eichrom) | EE average<br>(S*Pure) |
|-------|-------------------------------|------------------------|-------------------------|------------------------|
| 1     | 0.1 mL                        | 0.6 $\pm$ 0.5%         | 0.1 $\pm$ 0.1%          | 0.1 $\pm$ 0.2%         |
| 2     | 0.2 mL                        | 16.1 $\pm$ 4.7%        | 10.9 $\pm$ 4.6%         | 3.7 $\pm$ 2.6%         |
| 3     | 0.3 mL                        | 40.0 $\pm$ 5.4%        | 36.9 $\pm$ 9.8%         | 14.0 $\pm$ 3.5%        |
| 4     | 0.4 mL                        | 60.5 $\pm$ 7.5%        | 55.5 $\pm$ 9.8%         | 30.0 $\pm$ 3.6%        |
| 5     | 0.5 mL                        | 73.8 $\pm$ 3.4%        | 70.8 $\pm$ 7.4%         | 47.0 $\pm$ 2.3%        |

**Table S6.** Results of the [ $^{18}\text{F}$ ]fluoride EE using kryptofix-based elution method ( $n \geq 3$ ) obtained in microfluidic cassette using reactor R1 filled with approximately 25 mg of QMA- $\text{CO}_3$  beads from Waters®.

| Entry | Volume of eluent<br>( $\text{K}_{222}/\text{K}_2\text{CO}_3/\text{CH}_3\text{CN}$ eluent) | EE with 1% $\text{H}_2\text{O}$ | EE with 2%<br>$\text{H}_2\text{O}$ | EE with 3% $\text{H}_2\text{O}$ | EE with 5% $\text{H}_2\text{O}$ |
|-------|-------------------------------------------------------------------------------------------|---------------------------------|------------------------------------|---------------------------------|---------------------------------|
| 1     | 0.1 mL                                                                                    | 51.4 $\pm$ 14.6%                | 43.3 $\pm$ 26.6                    | 46.7 $\pm$ 11.2%                | 55.9 $\pm$ 26.8%                |
| 2     | 0.15 mL                                                                                   | 69.4 $\pm$ 5.4%                 | 82.2 $\pm$ 9.4%                    | 90.6 $\pm$ 2.5%                 | 94.1 $\pm$ 1.9%                 |
| 3     | 0.2 mL                                                                                    | 70.0 $\pm$ 7.4%                 | 86.9 $\pm$ 2.9%                    | 92.5 $\pm$ 3.9%                 | 93.1 $\pm$ 4.5%                 |
| 4     | 1 mL                                                                                      | 90.8 $\pm$ 1.2%                 | 97.6 $\pm$ 0.9%                    | 98.2 $\pm$ 0.6%                 | 98.7 $\pm$ 0.9%                 |
